# Supplementary material for: Increasing morphological disparity and decreasing optimality for jaw speed and strength during the radiation of jawed vertebrates
Source: PubMed Central journal article supplement (PMC8932669; doi:10.1126/sciadv.abl3644), 2022-03-18
Supplement: sciadv.abl3644_sm.pdf [file sciadv.abl3644_sm.pdf]

Supplementary Materials for

**Increasing morphological disparity and decreasing optimality for jaw speed and strength during the radiation of jawed vertebrates**

William J. Deakin\*, Philip S. L. Anderson, Wendy den Boer, Thomas J. Smith, Jennifer J. Hill, Martin Rücklin, Philip C. J. Donoghue\*, Emily J. Rayfield\*

\*Corresponding author. Email: wd15899@bristol.ac.uk (W.J.D.); phil.donoghue@bristol.ac.uk (P.C.J.D.); e.rayfield@bristol.ac.uk (E.J.R.)

Published 18 March 2022, *Sci. Adv.* **8**, eab13644 (2022)  
DOI: 10.1126/sciadv.ab13644

**This PDF file includes:**

Figs. S1 to S12

Dataset S1

References

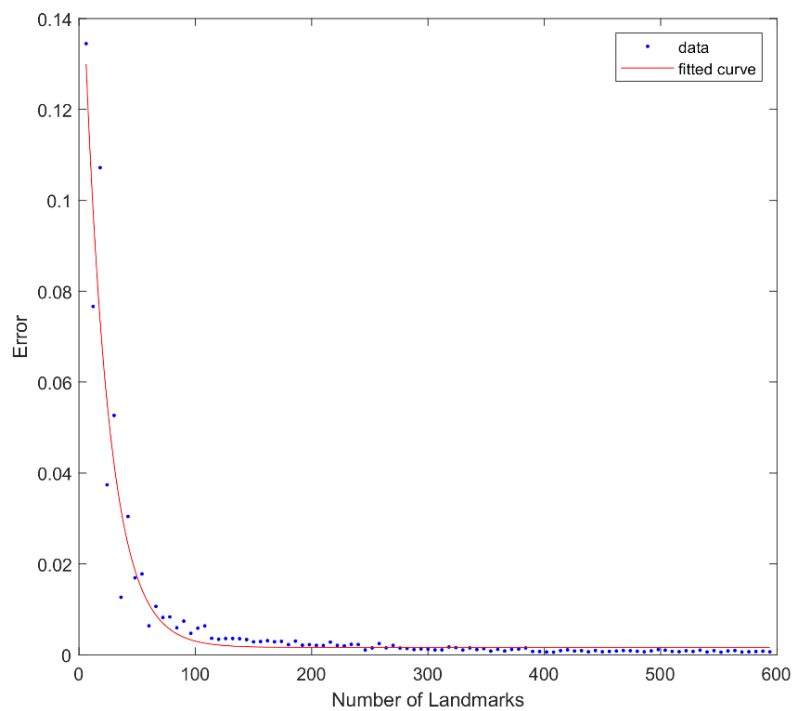

**Fig S1:** Landmark convergence test on *Acanthostega* outline. Optimal convergence is reached significantly before the chosen number, 600. 600 was chosen because it was the maximum possible number usable across all images, given varying image resolution, and the landmark number does not affect computation time significantly.

### Morphospace

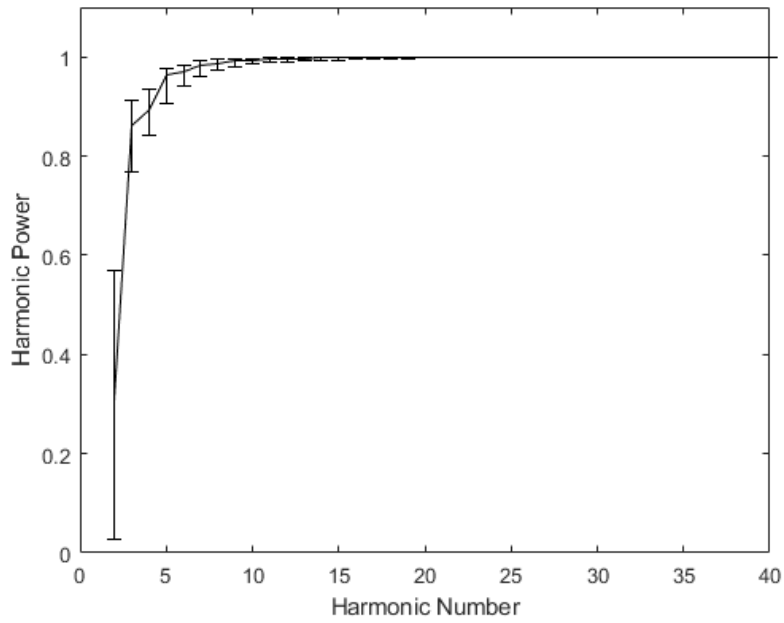

**Fig S2:** Harmonic power convergence across all taxa. Optimum number of harmonics was chosen as the point where the 5<sup>th</sup> percentile of taxa crosses the 0.99 power boundary (12 harmonics).

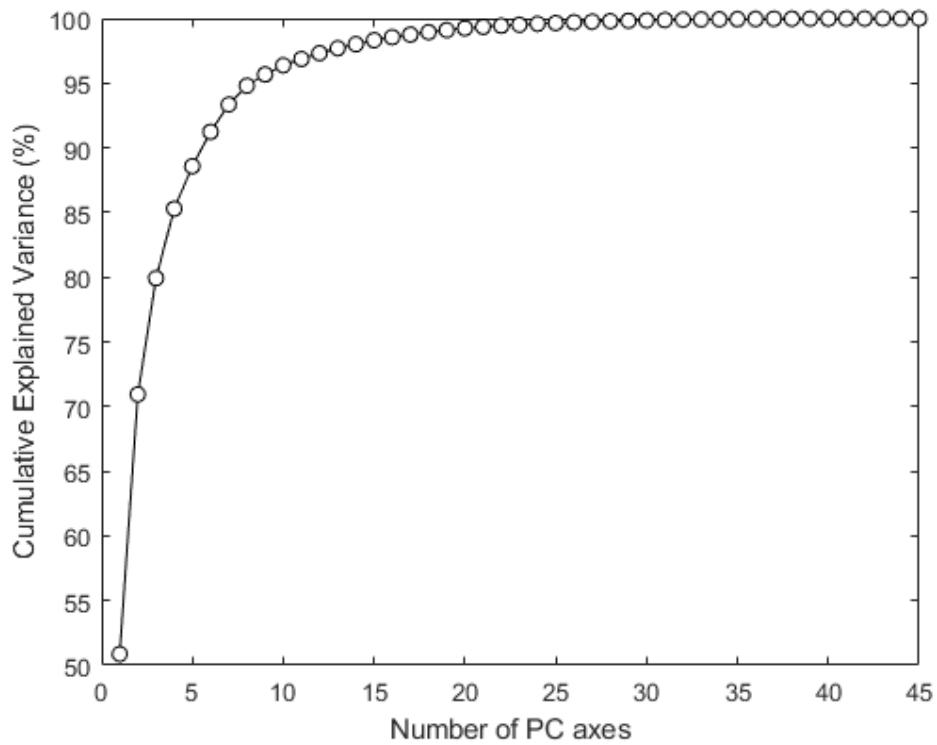

**Fig S3:** PCA Scree plot.

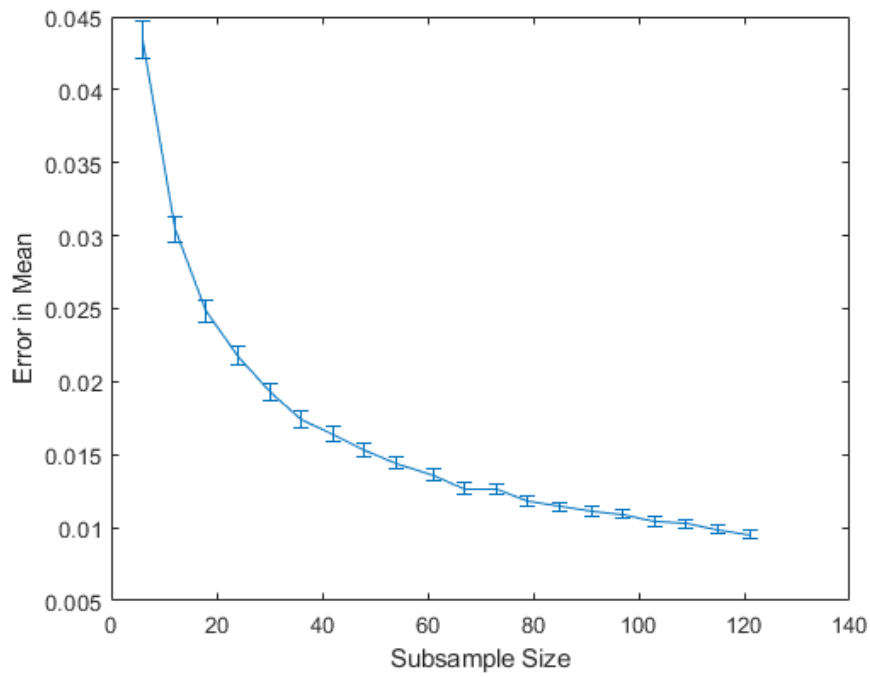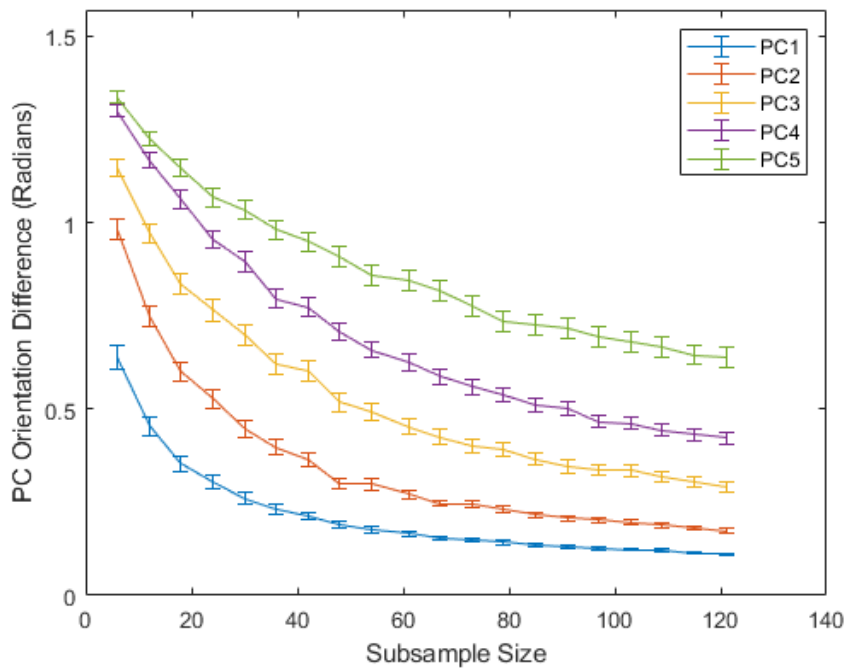

**Fig S4:** Sensitivity tests on theoretical morphospace at different sample sizes. Subsamples are built from bootstrapping the taxa and reperforming PCA. Top: Error in mean, Bottom: Error in orientation of the first 5 PC axes.

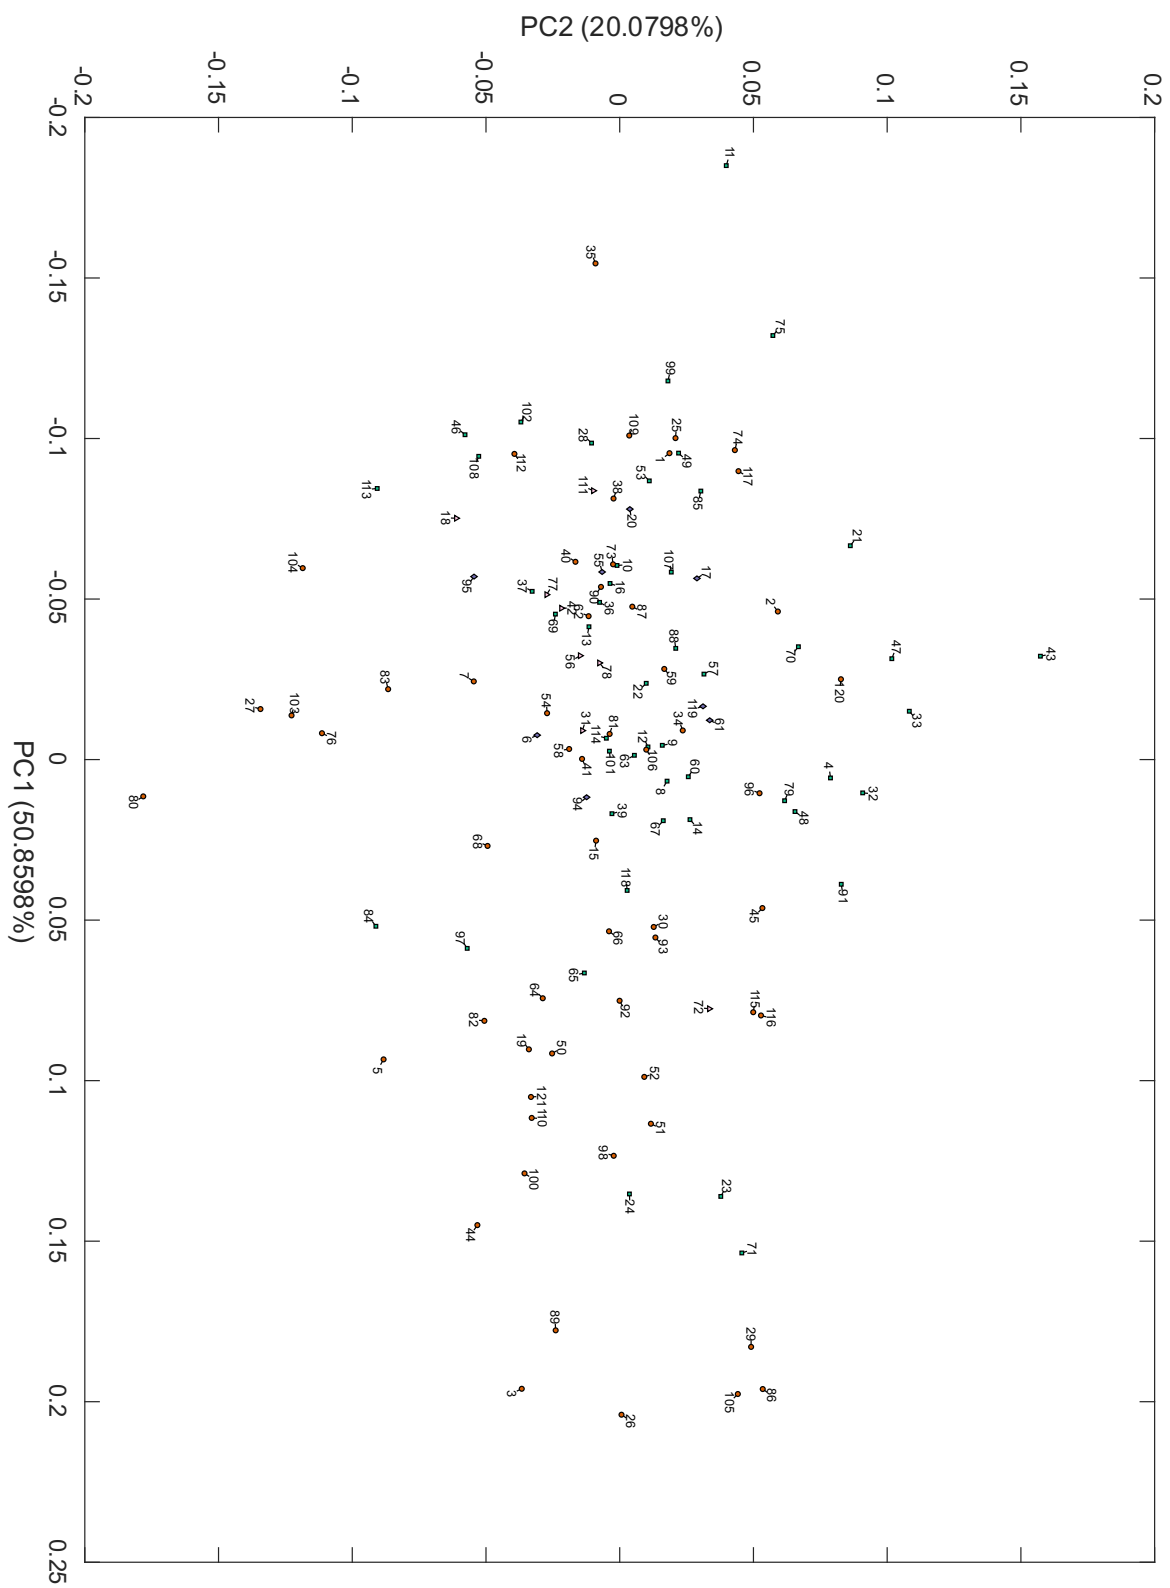

**Fig S5:** PC axes 1 and 2 with individual taxa labelled. Numbers represent taxon index (See Dataset S1A)

### Functional Performance

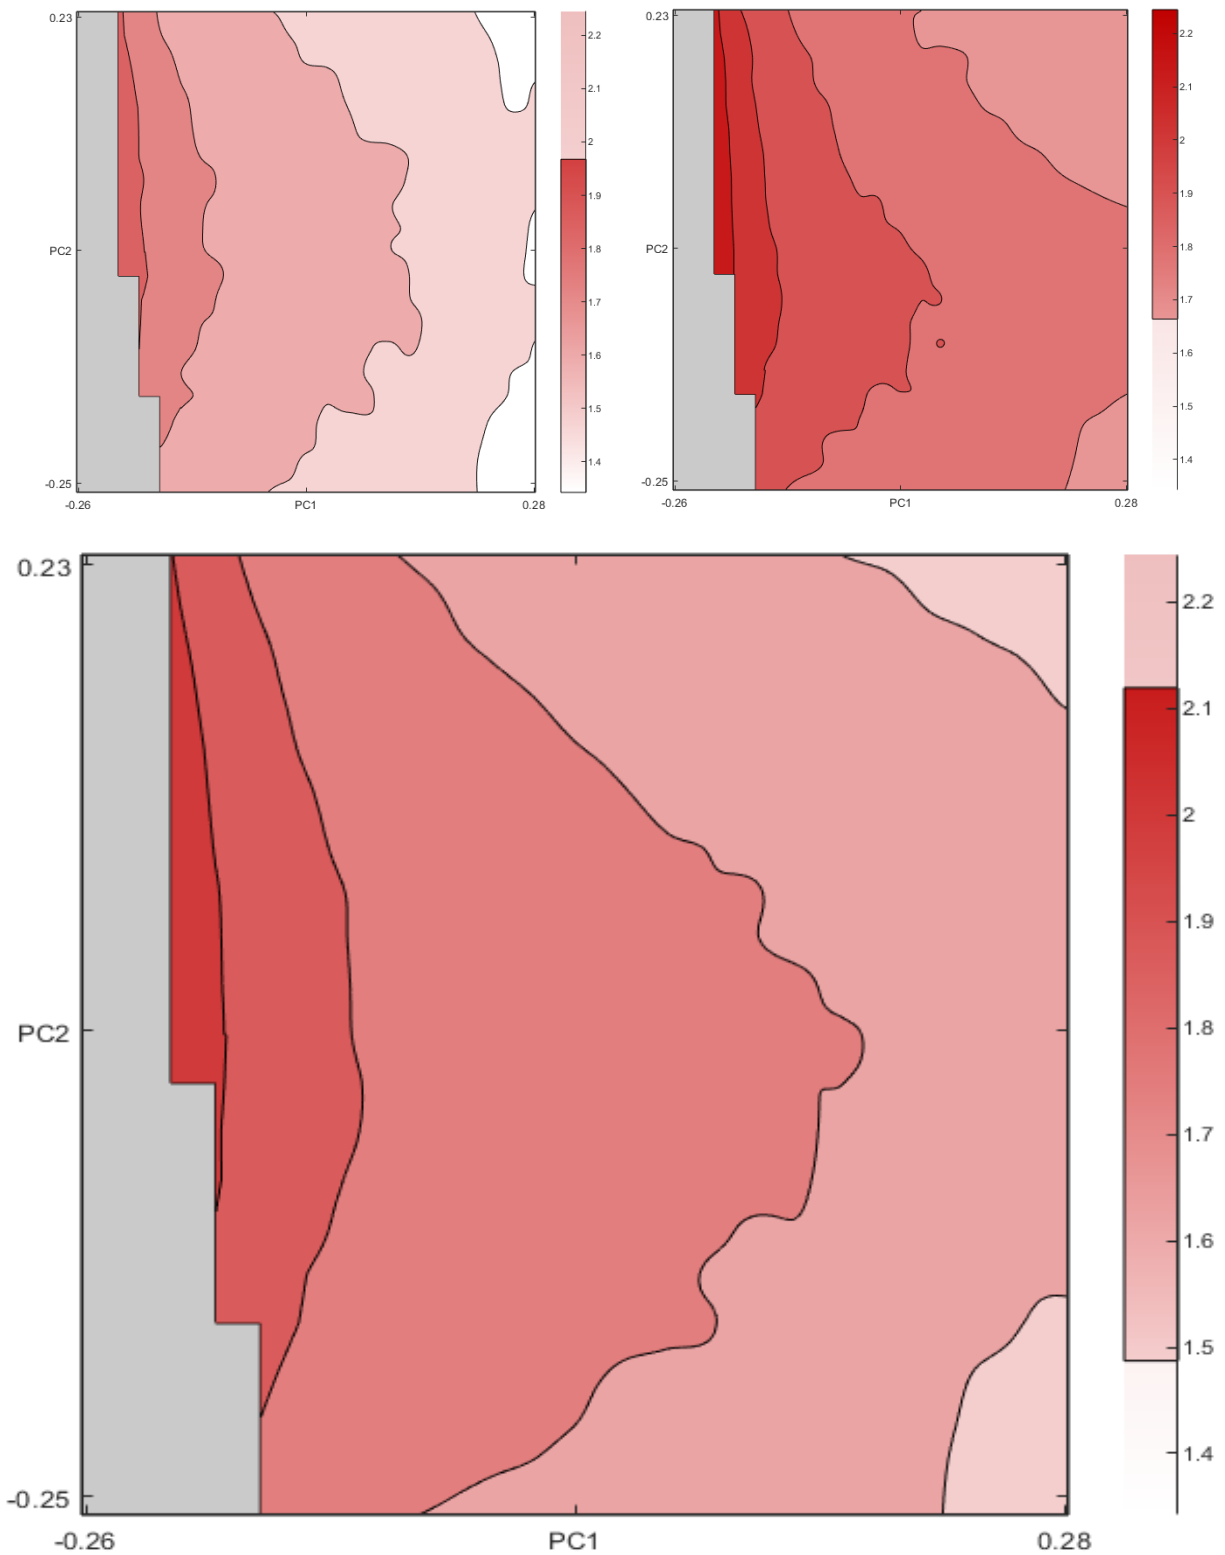

**Fig S6:** Rotational Efficiency (RE) surface plots. Top left: 5<sup>th</sup> percentile result of 1000 randomised inputs. Top right: 95<sup>th</sup> percentile result of 1000 randomised inputs. Bottom: mean result of 1000 randomised inputs.

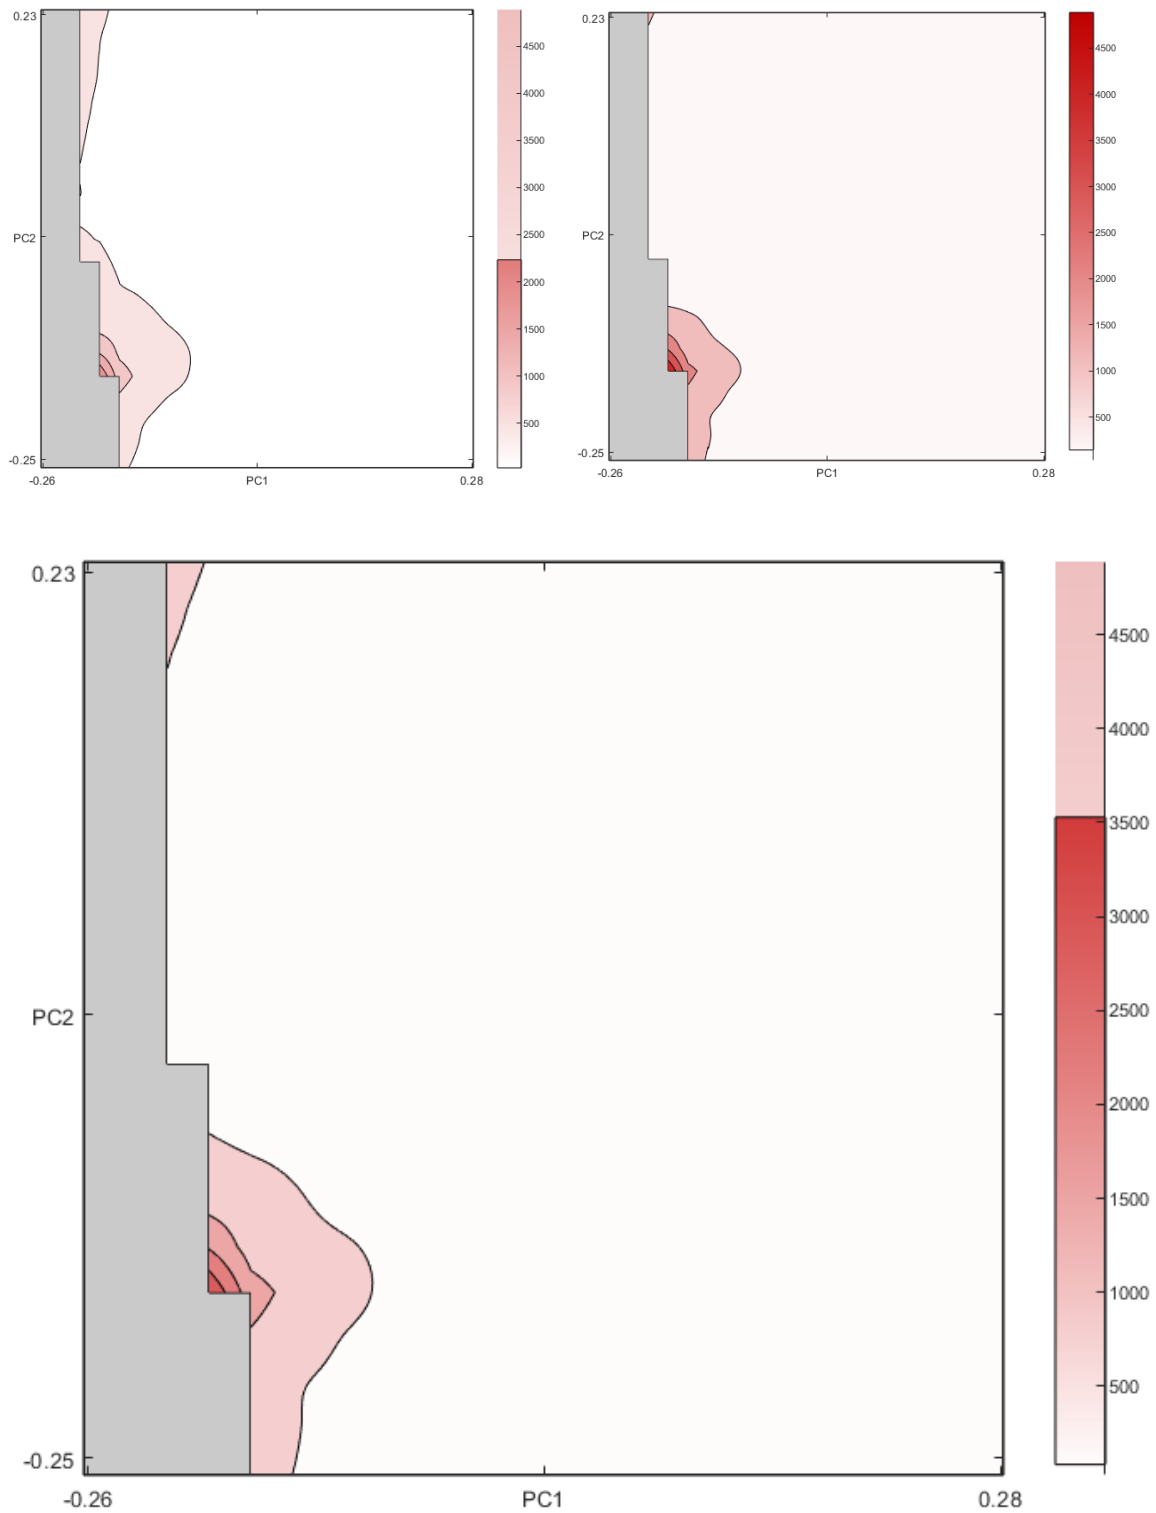

**Fig S7:** Von Mises Stress (VMS) surface plots. Top left: 5<sup>th</sup> percentile result of 1000 randomised inputs. Top right: 95<sup>th</sup> percentile result of 1000 randomised inputs. Bottom: mean result of 1000 randomised inputs.

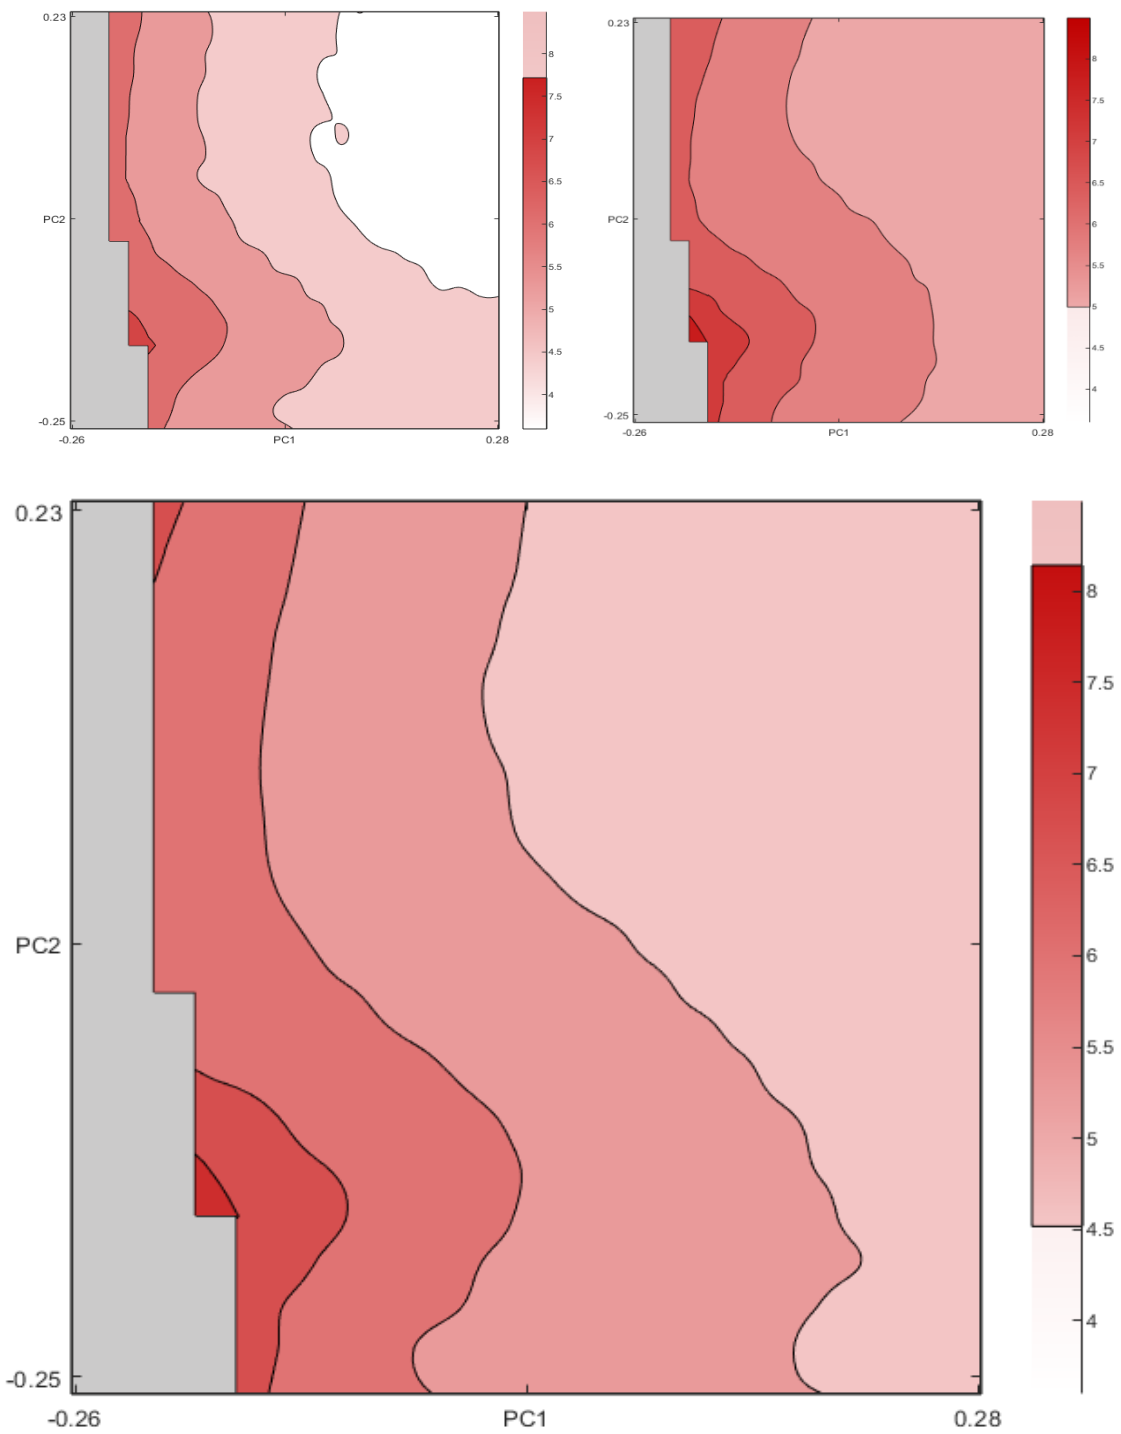

**Fig S8:** Log scaled Von Mises Stress (log VMS) surface plots. Top left: 5<sup>th</sup> percentile result of 1000 randomised inputs. Top right: 95<sup>th</sup> percentile result of 1000 randomised inputs. Bottom: mean result of 1000 randomised inputs.



# Phylogeny

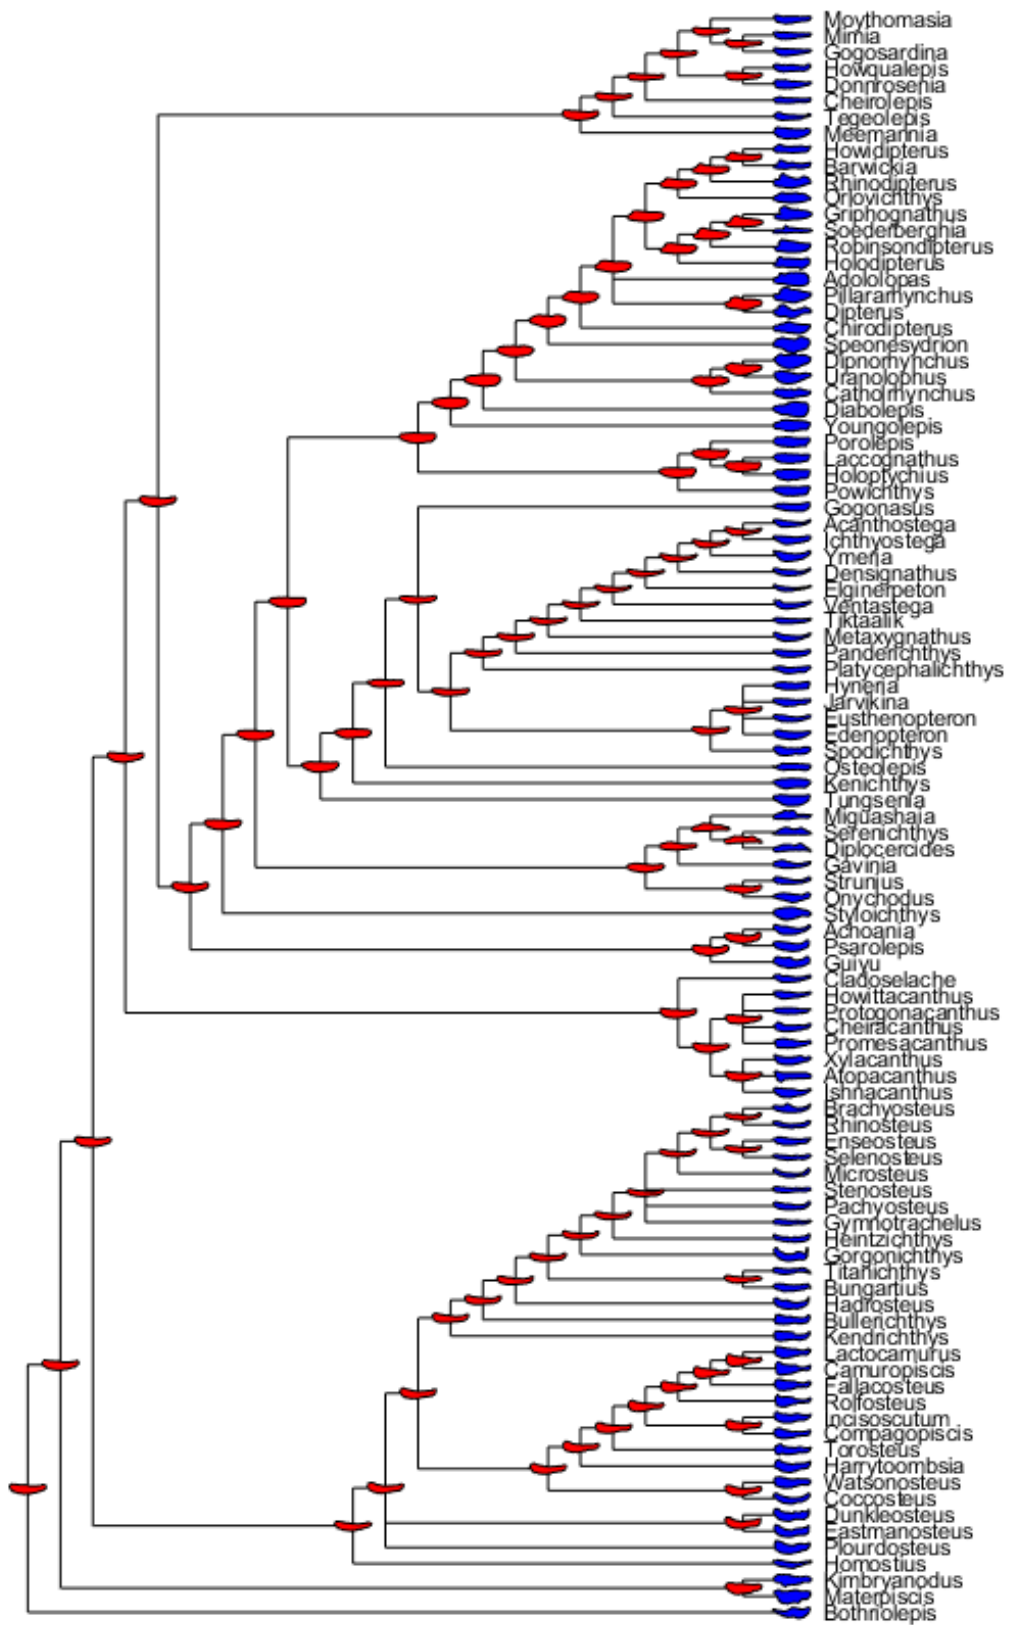

**Fig S9:** Phylogeny with taxon jaw shapes and ancestral jaw shapes superimposed. Blue shapes = empirical jaw shapes of sample taxa, red shapes = reconstructed jaw shapes output from ancestral state reconstruction.

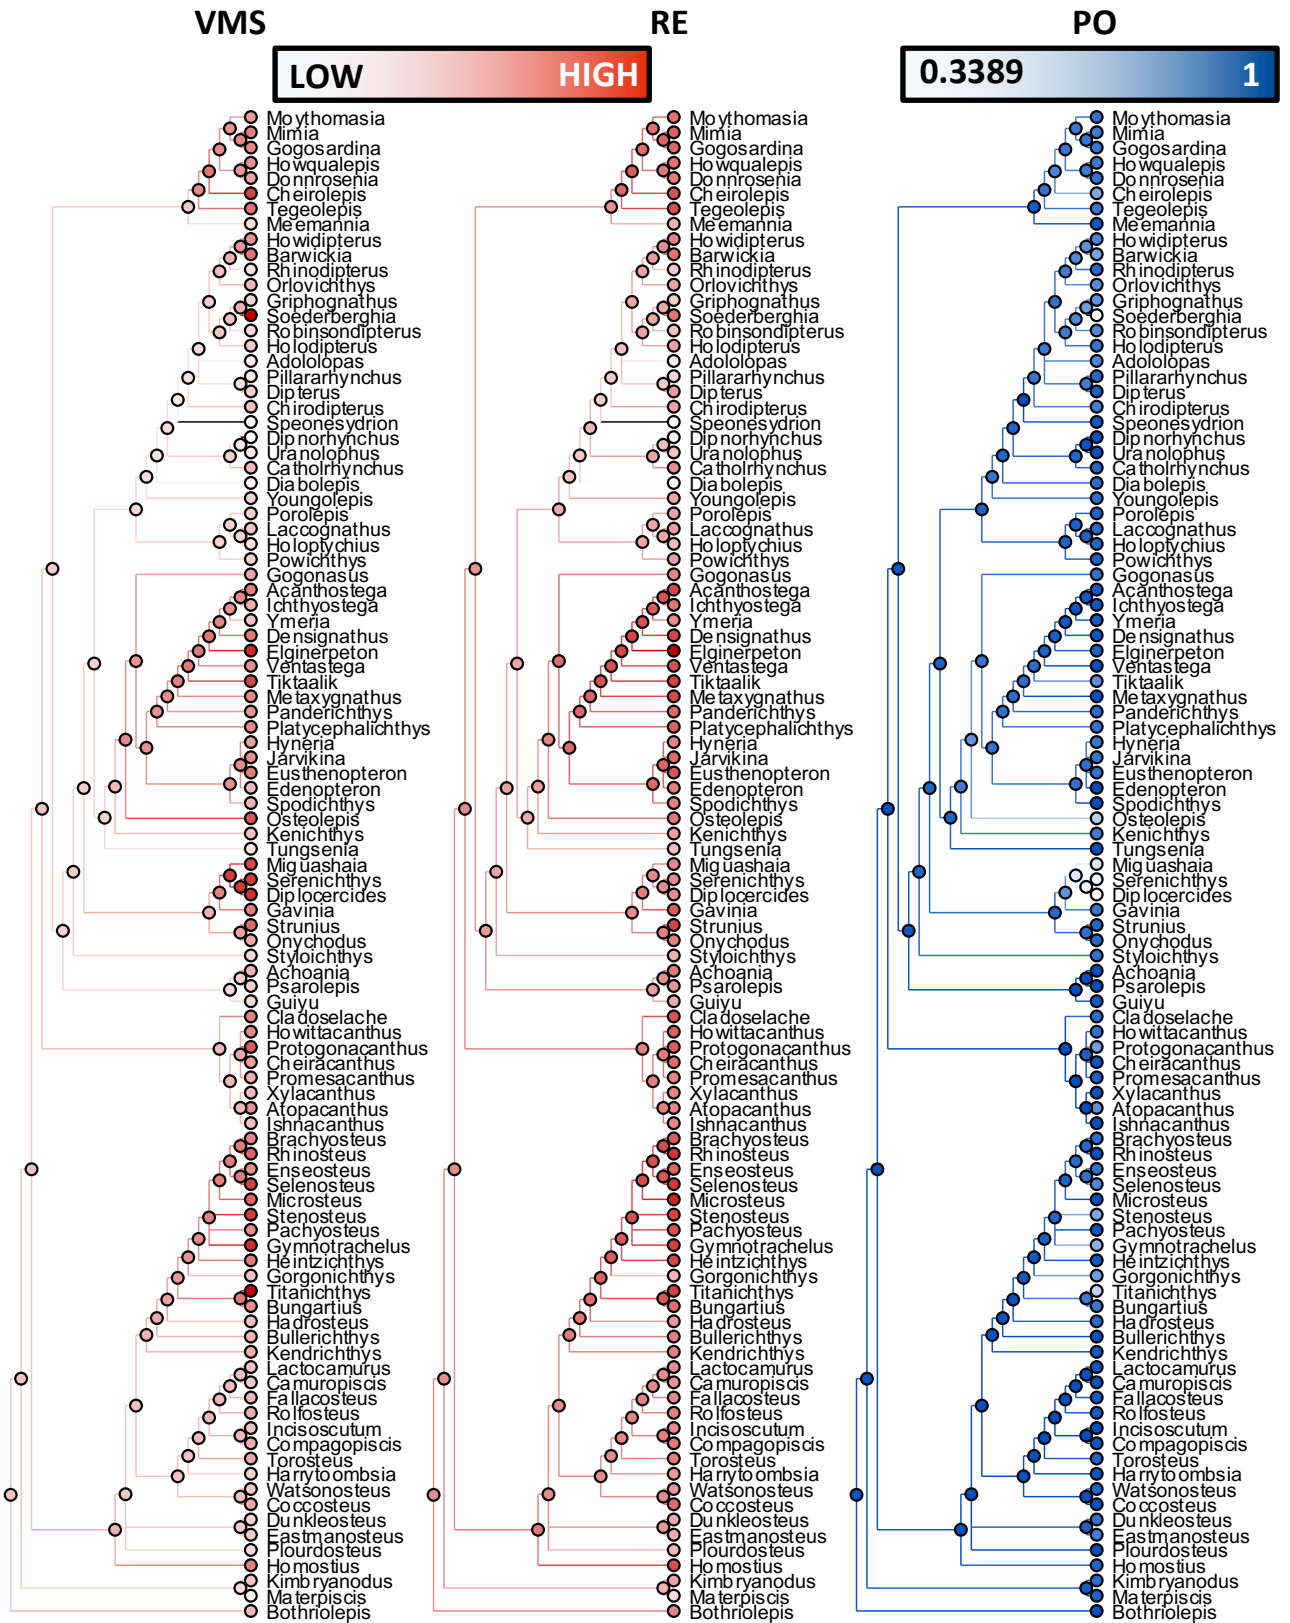

**Fig S10:** Phylogeny with extrapolated performance values (shades of red) and optimality values (shades of blue) superimposed. Coloured circles represent values of individual nodes (both empirical taxa and inferred ancestral states). VMS = Von Mises Stress; RE = Rotational Efficiency; PO = Pareto Optimality.

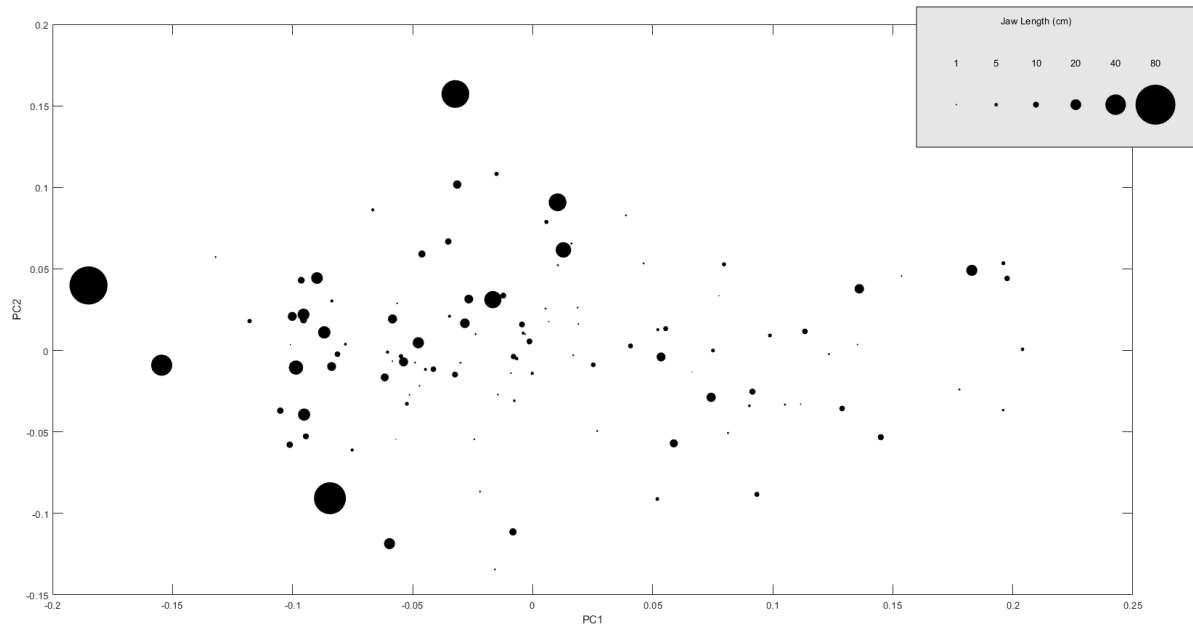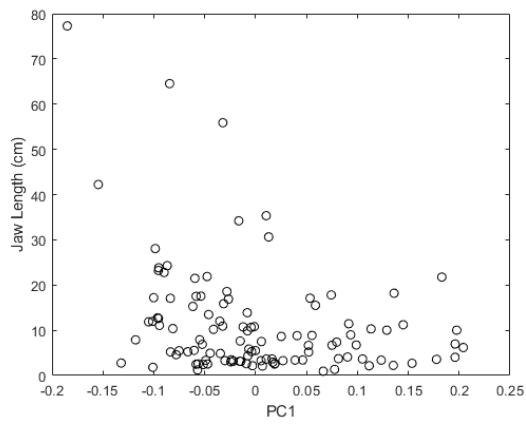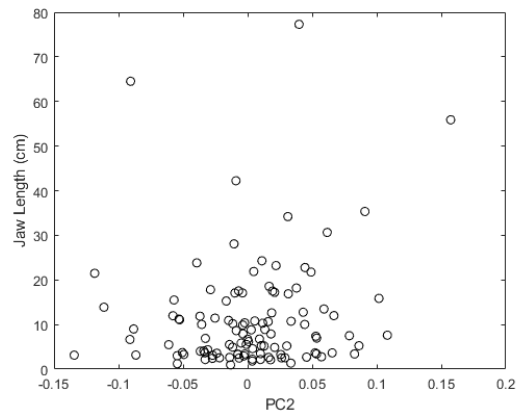

**Fig**

**S11:** Relationship between jaw length and shape. Longer Jaws appear to be biased towards lower PC1 values, but all PC2 values. Shorter jaws are less restricted in shape than longer jaws. A PGLS shows a significant relationship between jaw length and PC1 ( $p = 0.04129$ ,  $R\text{-squared} = 0.03485$ ), and no significant relationship between length and PC2 ( $p = 0.4846$ ,  $R\text{-squared} = 0.0056$ ).

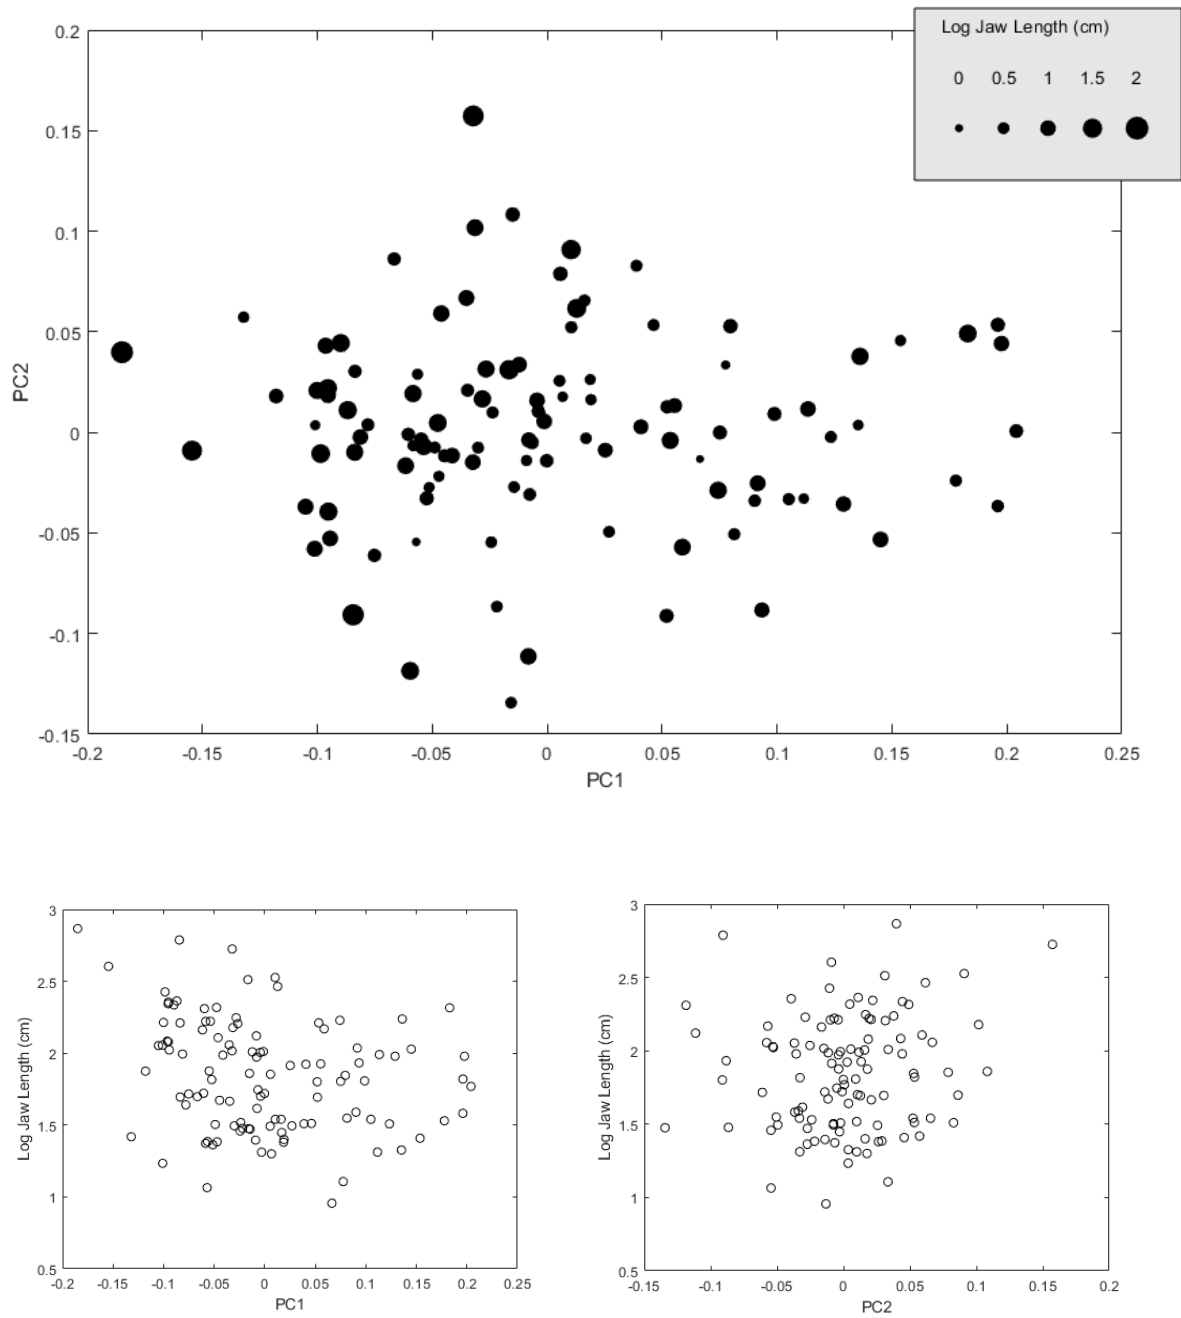

**Fig S12:** Relationship between log jaw length and shape. A PGLS shows a significant relationship between jaw length and PC1 ( $p = 0.00462$ ,  $R\text{-squared} = 0.0627$ ), and no significant relationship between length and PC2 ( $p = 0.3191$ ,  $R\text{-squared} = 0.00954$ ).

**Data S1: Data sources, polynomial fit of performance surfaces, and disparity metrics**

**Data S1A: Sources of mandible morphology data**

| Index Number | Genus                 | First Appearance | Last Appearance | Clade          | Image Type          | Image Source |
|--------------|-----------------------|------------------|-----------------|----------------|---------------------|--------------|
| 1            | <i>Acanthostega</i>   | Frasnian         | Famennian       | Sarcopterygii  | Reconstruction      | (83)         |
| 2            | <i>Achoania</i>       | Lochkovian       | Lochkovian      | Sarcopterygii  | Specimen Photograph | (84)         |
| 3            | <i>Adololopas</i>     | Frasnian         | Frasnian        | Sarcopterygii  | Specimen Photograph | (85)         |
| 4            | <i>Angarichthys</i>   | Eifelian         | Givetian        | Placodermi     | Specimen Photograph | (86)         |
| 5            | <i>Arquatichthys</i>  | Pragian          | Pragian         | Sarcopterygii  | Specimen Drawing    | (87)         |
| 6            | <i>Atopacanthus</i>   | Givetian         | Givetian        | Chondrichthyes | Specimen Photograph | (88)         |
| 7            | <i>Barwickia</i>      | Givetian         | Frasnian        | Sarcopterygii  | Reconstruction      | (89)         |
| 8            | <i>Bothriolepis</i>   | Frasnian         | Famennian       | Placodermi     | μCT Scan            | (90)         |
| 9            | <i>Brachydeirus</i>   | Frasnian         | Frasnian        | Placodermi     | Specimen Photograph | NHM: 53180   |
| 10           | <i>Brachyosteus</i>   | Frasnian         | Frasnian        | Placodermi     | Reconstruction      | (91)         |
| 11           | <i>Brontichthys</i>   | Famennian        | Famennian       | Placodermi     | Specimen Photograph | CMNH: 7575   |
| 12           | <i>Bullerichthys</i>  | Frasnian         | Frasnian        | Placodermi     | Specimen Photograph | WAM: 869703  |
| 13           | <i>Bungartius</i>     | Famennian        | Famennian       | Placodermi     | Specimen Drawing    | (92)         |
| 14           | <i>Camuropiscis</i>   | Frasnian         | Frasnian        | Placodermi     | Specimen Photograph | (5)          |
| 15           | <i>Cathlorhynchus</i> | Lochkovian       | Eifelian        | Sarcopterygii  | Specimen Photograph | (93)         |
| 16           | <i>Cavanosteus</i>    | Emsian           | Emsian          | Placodermi     | Specimen Photograph | ANU: V77     |
| 17           | <i>Cheiracanthus</i>  | Eifelian         | Givetian        | Chondrichthyes | Specimen Photograph | UCMZ: 1132   |
| 18           | <i>Cheirolepis</i>    | Emsian           | Frasnian        | Actinopterygii | Specimen Photograph | MNB: 5112    |
| 19           | <i>Chirodipterus</i>  | Frasnian         | Frasnian        | Sarcopterygii  | Specimen Photograph | MNB: 12875a  |
| 20           | <i>Cladoselache</i>   | Famennian        | Famennian       | Chondrichthyes | Specimen Drawing    | (94)         |
| 21           | <i>Cocosteus</i>      | Eifelian         | Givetian        | Placodermi     | Specimen Photograph | (95)         |
| 22           | <i>Compagopiscis</i>  | Frasnian         | Frasnian        | Placodermi     | μCT Scan            | (90)         |
| 23           | <i>Copanognathus</i>  | Frasnian         | Frasnian        | Placodermi     | Specimen Drawing    | (96)         |
| 24           | <i>Denisonodus</i>    | Frasnian         | Frasnian        | Placodermi     | Specimen Photograph | (97)         |
| 25           | <i>Densignathus</i>   | Famennian        | Famennian       | Sarcopterygii  | Reconstruction      | (98)         |
| 26           | <i>Diabolepis</i>     | Lochkovian       | Lochkovian      | Sarcopterygii  | Specimen Photograph | (99)         |
| 27           | <i>Diplocercides</i>  | Givetian         | Frasnian        | Sarcopterygii  | Reconstruction      | (100)        |
| 28           | <i>Diplognathus</i>   | Famennian        | Famennian       | Placodermi     | Reconstruction      | (91)         |
| 29           | <i>Dipnorhynchus</i>  | Emsian           | Emsian          | Sarcopterygii  | Specimen Photograph | NHM: 46773   |

|    |                       |           |           |                |                     |             |
|----|-----------------------|-----------|-----------|----------------|---------------------|-------------|
| 30 | <i>Dipterus</i>       | Famennian | Famennian | Sarcopterygii  | Specimen Photograph | NHM: P34552 |
| 31 | <i>Donnrosenia</i>    | Givetian  | Givetian  | Actinopterygii | Specimen Photograph | (72)        |
| 32 | <i>Dunkleosteus</i>   | Famennian | Famennian | Placodermi     | Specimen Photograph | (5)         |
| 33 | <i>Eastmanosteus</i>  | Givetian  | Famennian | Placodermi     | Specimen Photograph | (5)         |
| 34 | <i>Edenopteron</i>    | Famennian | Famennian | Sarcopterygii  | Reconstruction      | (101)       |
| 35 | <i>Elginerpeton</i>   | Frasnian  | Frasnian  | Sarcopterygii  | Reconstruction      | (83)        |
| 36 | <i>Enseosteus</i>     | Frasnian  | Frasnian  | Placodermi     | Specimen Photograph | MNB: 18318  |
| 37 | <i>Erromenosteus</i>  | Frasnian  | Frasnian  | Placodermi     | Specimen Photograph | MNB: 139    |
| 38 | <i>Eusthenopteron</i> | Givetian  | Famennian | Sarcopterygii  | Reconstruction      | (102)       |
| 39 | <i>Fallacosteus</i>   | Frasnian  | Frasnian  | Placodermi     | Specimen Photograph | (5)         |
| 40 | <i>Gavinia</i>        | Eifelian  | Givetian  | Sarcopterygii  | Reconstruction      | (103)       |
| 41 | <i>Gogonasus</i>      | Frasnian  | Frasnian  | Sarcopterygii  | Specimen Photograph | (104)       |
| 42 | <i>Gogosardina</i>    | Frasnian  | Frasnian  | Actinopterygii | Specimen Photograph | (105)       |
| 43 | <i>Gorgonichthys</i>  | Famennian | Famennian | Placodermi     | Specimen Photograph | (5)         |
| 44 | <i>Griphognathus</i>  | Frasnian  | Frasnian  | Sarcopterygii  | Specimen Photograph | ANU: 21186  |
| 45 | <i>Guiyu</i>          | Silurian  | Silurian  | Sarcopterygii  | Specimen Photograph | (70)        |
| 46 | <i>Gymnotrachelus</i> | Famennian | Famennian | Placodermi     | Specimen Photograph | CMNH: 8051  |
| 47 | <i>Hadrosteus</i>     | Frasnian  | Frasnian  | Placodermi     | Reconstruction      | (91)        |
| 48 | <i>Harrytoombsia</i>  | Frasnian  | Frasnian  | Placodermi     | Specimen Photograph | WAM: 704254 |
| 49 | <i>Heintzichthys</i>  | Frasnian  | Famennian | Placodermi     | Specimen Photograph | (106)       |
| 50 | <i>Holodipterus</i>   | Frasnian  | Frasnian  | Sarcopterygii  | Reconstruction      | (100)       |
| 51 | <i>Holodus</i>        | Frasnian  | Frasnian  | Sarcopterygii  | Specimen Drawing    | (107)       |
| 52 | <i>Holoptychius</i>   | Givetian  | Famennian | Sarcopterygii  | Specimen Photograph | (108)       |
| 53 | <i>Homostius</i>      | Emsian    | Givetian  | Placodermi     | Specimen Photograph | (109)       |
| 54 | <i>Howidipterus</i>   | Frasnian  | Frasnian  | Sarcopterygii  | Reconstruction      | (89)        |
| 55 | <i>Howittacanthus</i> | Givetian  | Givetian  | Chondrichthyes | Specimen Drawing    | (110)       |
| 56 | <i>Howqualepis</i>    | Givetian  | Givetian  | Actinopterygii | Specimen Drawing    | (111)       |
| 57 | <i>Hussakofia</i>     | Famennian | Famennian | Placodermi     | Specimen Photograph | CMNH: 8082  |
| 58 | <i>Hyneria</i>        | Famennian | Famennian | Sarcopterygii  | Specimen Drawing    | (112)       |
| 59 | <i>Ichthyostega</i>   | Famennian | Famennian | Sarcopterygii  | Reconstruction      | (83)        |
| 60 | <i>Incisoscutum</i>   | Frasnian  | Frasnian  | Placodermi     | Specimen Photograph | (106)       |

|    |                           |            |            |                |                     |             |
|----|---------------------------|------------|------------|----------------|---------------------|-------------|
| 61 | <i>Ishnacanthus</i>       | Silurian   | Eifelian   | Chondrichthyes | Specimen Photograph | (113)       |
| 62 | <i>Jarvikina</i>          | Givetian   | Famennian  | Sarcopterygii  | Specimen Photograph | (114)       |
| 63 | <i>Kendrichthys</i>       | Frasnian   | Frasnian   | Placodermi     | Specimen Photograph | NHM: P51143 |
| 64 | <i>Kenichthys</i>         | Emsian     | Emsian     | Sarcopterygii  | Reconstruction      | (84)        |
| 65 | <i>Kimbryanodus</i>       | Frasnian   | Frasnian   | Placodermi     | Specimen Photograph | (115)       |
| 66 | <i>Laccognathus</i>       | Givetian   | Frasnian   | Sarcopterygii  | Specimen Photograph | (116)       |
| 67 | <i>Lactocamurus</i>       | Frasnian   | Frasnian   | Placodermi     | Specimen Photograph | (5)         |
| 68 | <i>Latvius</i>            | Givetian   | Frasnian   | Sarcopterygii  | Reconstruction      | MNB: f551   |
| 69 | <i>Leptosteus</i>         | Frasnian   | Frasnian   | Placodermi     | Specimen Photograph | MNB: 12709  |
| 70 | <i>Malerosteus</i>        | Frasnian   | Frasnian   | Placodermi     | Specimen Photograph | (117)       |
| 71 | <i>Materpiscis</i>        | Frasnian   | Frasnian   | Placodermi     | Specimen Drawing    | (118)       |
| 72 | <i>Meemania</i>           | Lochkovian | Lochkovian | Actinopterygii | Specimen Drawing    | (119)       |
| 73 | <i>Megamastax</i>         | Silurian   | Silurian   | Sarcopterygii  | Specimen Photograph | (120)       |
| 74 | <i>Metaxygnathus</i>      | Famennian  | Famennian  | Sarcopterygii  | Reconstruction      | (83)        |
| 75 | <i>Microsteus</i>         | Frasnian   | Frasnian   | Placodermi     | Specimen Photograph | MNB: 18324  |
| 76 | <i>Miguashaia</i>         | Givetian   | Frasnian   | Sarcopterygii  | Reconstruction      | (121)       |
| 77 | <i>Mimia</i>              | Frasnian   | Frasnian   | Actinopterygii | Reconstruction      | (84)        |
| 78 | <i>Moythomasia</i>        | Givetian   | Famennian  | Actinopterygii | Specimen Drawing    | NHM: P53221 |
| 79 | <i>Mylostoma</i>          | Famennian  | Famennian  | Placodermi     | Specimen Photograph | CMNH: 7706  |
| 80 | <i>Nesides</i>            | Frasnian   | Frasnian   | Sarcopterygii  | Reconstruction      | (103)       |
| 81 | <i>Onychodus</i>          | Emsian     | Famennian  | Sarcopterygii  | Reconstruction      | (103)       |
| 82 | <i>Orlovichthys</i>       | Famennian  | Famennian  | Sarcopterygii  | Specimen Drawing    | (122)       |
| 83 | <i>Osteolepis</i>         | Eifelian   | Givetian   | Sarcopterygii  | Specimen Photograph | UCMZ: GN769 |
| 84 | <i>Oxyosteus</i>          | Frasnian   | Frasnian   | Placodermi     | Specimen Photograph | MNB: 296    |
| 85 | <i>Pachyosteus</i>        | Frasnian   | Famennian  | Placodermi     | Specimen Photograph | MNB: 389    |
| 86 | <i>Paledaphus</i>         | Frasnian   | Famennian  | Sarcopterygii  | Specimen Photograph | AMNH: 6560  |
| 87 | <i>Panderichthys</i>      | Givetian   | Frasnian   | Sarcopterygii  | Specimen Drawing    | (83)        |
| 88 | <i>Pholidosteus</i>       | Frasnian   | Frasnian   | Placodermi     | Specimen Photograph | MNB: 12797  |
| 89 | <i>Pillararhynchus</i>    | Frasnian   | Frasnian   | Sarcopterygii  | Specimen Photograph | (123)       |
| 90 | <i>Platycephalichthys</i> | Frasnian   | Frasnian   | Sarcopterygii  | Reconstruction      | (7)         |
| 91 | <i>Plourdosteus</i>       | Givetian   | Frasnian   | Placodermi     | Specimen Photograph | (124)       |

|     |                         |            |            |                |                     |              |
|-----|-------------------------|------------|------------|----------------|---------------------|--------------|
| 92  | <i>Porolepis</i>        | Lochkovian | Pragian    | Sarcopterygii  | Specimen Photograph | (125)        |
| 93  | <i>Powichthys</i>       | Lochkovian | Lochkovian | Sarcopterygii  | Reconstruction      | (126)        |
| 94  | <i>Promesacanthus</i>   | Lochkovian | Lochkovian | Chondrichthyes | Specimen Drawing    | (127)        |
| 95  | <i>Protogonacanthus</i> | Frasnian   | Famennian  | Chondrichthyes | Reconstruction      | (128)        |
| 96  | <i>Psarolepis</i>       | Silurian   | Lochkovian | Sarcopterygii  | Specimen Photograph | (84)         |
| 97  | <i>Ptyctodus</i>        | Eifelian   | Famennian  | Placodermi     | Specimen Photograph | (96)         |
| 98  | <i>Rhinodipterus</i>    | Frasnian   | Famennian  | Sarcopterygii  | Specimen Photograph | (123)        |
| 99  | <i>Rhinosteus</i>       | Frasnian   | Frasnian   | Placodermi     | Reconstruction      | (91)         |
| 100 | <i>Robinsondipterus</i> | Frasnian   | Frasnian   | Sarcopterygii  | Specimen Photograph | WAM: 011003  |
| 101 | <i>Rolfosteus</i>       | Frasnian   | Frasnian   | Placodermi     | Specimen Photograph | NHM: P50971  |
| 102 | <i>Selenosteus</i>      | Frasnian   | Famennian  | Placodermi     | Specimen Photograph | CMNH: 8086   |
| 103 | <i>Serenichthys</i>     | Famennian  | Famennian  | Sarcopterygii  | Reconstruction      | (129)        |
| 104 | <i>Soederberghia</i>    | Frasnian   | Famennian  | Sarcopterygii  | Reconstruction      | (100)        |
| 105 | <i>Speonesydrion</i>    | Pragian    | Pragian    | Sarcopterygii  | Specimen Photograph | ANU: 35647   |
| 106 | <i>Spodichthys</i>      | Frasnian   | Frasnian   | Sarcopterygii  | $\mu$ CT Scan       | (130)        |
| 107 | <i>Stenognathus</i>     | Frasnian   | Frasnian   | Placodermi     | Specimen Drawing    | (96)         |
| 108 | <i>Stenosteus</i>       | Frasnian   | Famennian  | Placodermi     | Specimen Photograph | CMNH: 8044   |
| 109 | <i>Strunius</i>         | Givetian   | Famennian  | Sarcopterygii  | Specimen Photograph | MNB: 161b    |
| 110 | <i>Styloichthys</i>     | Lochkovian | Lochkovian | Sarcopterygii  | Specimen Photograph | (84)         |
| 111 | <i>Tegeolepis</i>       | Frasnian   | Famennian  | Actinopterygii | Specimen Photograph | NHM: P45312  |
| 112 | <i>Tiktaalik</i>        | Frasnian   | Frasnian   | Sarcopterygii  | Specimen Photograph | (131)        |
| 113 | <i>Titanichthys</i>     | Famennian  | Famennian  | Placodermi     | Specimen Photograph | (132)        |
| 114 | <i>Torosteus</i>        | Frasnian   | Frasnian   | Placodermi     | Specimen Photograph | WAM: 8863    |
| 115 | <i>Tungsenia</i>        | Pragian    | Pragian    | Sarcopterygii  | Reconstruction      | (133)        |
| 116 | <i>Uranolophus</i>      | Pragian    | Eifelian   | Sarcopterygii  | Specimen Photograph | FMNH: PF3874 |
| 117 | <i>Ventastega</i>       | Famennian  | Famennian  | Sarcopterygii  | Specimen Drawing    | (83)         |
| 118 | <i>Watsonosteus</i>     | Eifelian   | Givetian   | Placodermi     | Specimen Drawing    | (134)        |
| 119 | <i>Xylacanthus</i>      | Silurian   | Pragian    | Chondrichthyes | Specimen Photograph | (135)        |
| 120 | <i>Ymeria</i>           | Frasnian   | Famennian  | Sarcopterygii  | Reconstruction      | (136)        |
| 121 | <i>Youngolepis</i>      | Lochkovian | Pragian    | Sarcopterygii  | Reconstruction      | (84)         |

|              |                                    |
|--------------|------------------------------------|
| Abbreviation | Institution                        |
| NHM          | Natural History Museum, London, UK |



|      |                                                          |
|------|----------------------------------------------------------|
| MNB  | Museum für Naturkunde, Berlin, Germany                   |
| CMNH | Cleveland Museum of Natural History, Cleveland, OH, USA  |
| WAM  | Western Australian Museum, Perth, Australia              |
| ANU  | Australian National University, Canberra, Australia      |
| UCMZ | University of Cambridge Museum of Zoology, Cambridge, UK |
| FMNH | The Field Museum, Chicago, IL, USA                       |
| AMNH | American Museum of natural History, New York, NY, USA    |

**Data S1B: Second order polynomial fit to Rotational Efficiency (RE) and Von Mises Stress (VMS) surface**

**Equation:**

|                       | RE       | RE 5% ci | RE 95% ci | VMS    | VMS 5% ci | VMS 95% ci |
|-----------------------|----------|----------|-----------|--------|-----------|------------|
| <b>p<sub>c</sub></b>  | 1.805    | 1.8      | 1.81      | 255.5  | 225.6     | 285.5      |
| <b>p<sub>x</sub></b>  | -0.7324  | -0.755   | -0.7099   | -1783  | -1914     | -1652      |
| <b>p<sub>y</sub></b>  | -0.04755 | -0.06746 | -0.02764  | -734.9 | -850.6    | -619.3     |
| <b>p<sub>xx</sub></b> | 1.308    | 0.8923   | 1.185     | 5205   | 4356      | 6054       |
| <b>p<sub>xy</sub></b> | -0.1133  | -0.2447  | 0.01808   | 3364   | 2600      | 4127       |
| <b>p<sub>yy</sub></b> | -1.837   | -1.977   | -1.697    | 1046   | 234       | 1858       |

**Goodness of Fit:**

|                               | RE      | VMS      |
|-------------------------------|---------|----------|
| <b>SSE</b>                    | 0.3619  | 12210000 |
| <b>R<sup>2</sup></b>          | 0.928   | 0.6669   |
| <b>Adjusted R<sup>2</sup></b> | 0.9272  | 0.663    |
| <b>RMSE</b>                   | 0.02929 | 170.1191 |

**Data S1C: Spearman rank correlation test for trend over time (\* = significant at p < 0.05)**

|            | Sum of Variances | Mean Pairwise Distance | Mean Optimality |
|------------|------------------|------------------------|-----------------|
| <b>rho</b> | 0.6667           | 0.8810*                | -0.9286*        |
| <b>p</b>   | 0.0831           | 0.0072                 | 0.0022          |

**Data S1D: Pearson's linear rank test of disparity metrics against mean optimality (\* = significant at p < 0.05)**

|          | Sum of Variances | Mean Pairwise Distance |
|----------|------------------|------------------------|
| <b>r</b> | -0.5476          | -0.7619*               |

**p**

0.171

0.0368

---

## REFERENCES AND NOTES

1. P. C. J. Donoghue, J. N. Keating, Early vertebrate evolution. *Palaeontology* **57**, 879–893 (2014).
2. R. H. Denison, Feeding mechanisms of agnatha and early gnathostomes. *Am. Zool.* **1**, 177–181 (1961).
3. K. Dennis, R. S. Miles, New durophagous arthrodires from Gogo, Western-Australia. *Zool. J. Linnean Soc.* **69**, 43–85 (1980).
4. P. S. L. Anderson, M. W. Westneat, Feeding mechanics and bite force modelling of the skull of *Dunkleosteus terelli*, an ancient apex predator. *Biol. Lett.* **3**, 76–79 (2006).
5. E. Snively, P. S. L. Anderson, M. J. Ryan, Functional and ontogenetic implications of bite stress in arthrodiire placoderms. *Kirtlandia* **57**, 53–60 (2009).
6. P. S. L. Anderson, M. Friedman, M. D. Brazeau, E. J. Rayfield, Initial radiation of jaws demonstrated stability despite faunal and environmental change. *Nature* **476**, 206–209 (2011).
7. P. S. L. Anderson, M. Friedman, M. Ruta, Late to the table: Diversification of tetrapod mandibular biomechanics lagged behind the evolution of terrestriality. *Integr. Comp. Biol.* **53**, 197–208 (2013).
8. F. P. Kuhl, C. R. Giardina, Elliptic fourier features of a closed contour. *Comput. Graph. Image Process.* **18**, 236–258 (1982).
9. G. R. McGhee Jr., Shell form in the biconvex articulate brachiopoda: A geometric analysis. *Paleobiology* **6**, 57–76 (1980).
10. G. R. McGhee, *The Geometry of Evolution: Adaptive Landscapes and Theoretical Morphospaces* (Cambridge Univ. Press, 2007), pp. 200.
11. J. J. Hill, M. N. Puttick, T. L. Stubbs, E. J. Rayfield, P. C. J. Donoghue, Evolution of jaw disparity in fishes. *Palaeontology* **61**, 847–854 (2018).

12. B. Figueirido, Z. J. Tseng, A. Martin-Serra, Skull shape evolution in durophagous carnivorans. *Evolution* **67**, 1975–1993 (2013).
13. M. N. Simon, R. Brandt, T. Kohlsdorf, S. J. Arnold, Bite performance surfaces of three ecologically divergent Iguanidae lizards: Relationships with lower jaw bones. *Biol. J. Linn. Soc.* **127**, 810–825 (2019).
14. P. C. Wainwright, M. E. Alfaro, D. I. Bolnick, C. D. Hulsey, Many-to-one mapping of form to function: A general principle in organismal design? *Integr. Comp. Biol.* **45**, 256–262 (2005).
15. P. D. Polly, C. T. Stayton, E. R. Dumont, S. E. Pierce, E. J. Rayfield, K. D. Angielczyk, Combining geometric morphometrics and finite element analysis with evolutionary modeling: Towards a synthesis. *J. Vertebr. Paleontol.* **36**, e1111225 (2016).
16. C. T. Stayton, Performance in three shell functions predicts the phenotypic distribution of hard-shelled turtles. *Evolution* **73**, 720–734 (2019).
17. C. T. Stayton, L. F. O'Connor, N. M. Nisivoccia, The influence of multiple functional demands on morphological diversification: A test on turtle shells. *Evolution* **72**, 1933–1949 (2018).
18. Z. J. Tseng, Testing adaptive hypotheses of convergence with functional landscapes: A case study of bone-cracking hypercarnivores. *PLOS ONE* **8**, e65305 (2013).
19. B. V. Dickson, S. E. Pierce, Functional performance of turtle humerus shape across an ecological adaptive landscape. *Evolution* **73**, 1265–1277 (2019).
20. S. J. Arnold, Morphology, performance and fitness. *Am. Zool.* **23**, 347–361 (1983).
21. S. J. Arnold, Performance surfaces and adaptive landscapes. *Integr. Comp. Biol.* **43**, 367–375 (2003).
22. C. H. Martin, P. C. Wainwright, Multiple fitness peaks on the adaptive landscape drive adaptive radiation in the wild. *Science* **339**, 208–211 (2013).
23. B. V. Dickson, J. A. Clack, T. R. Smithson, S. E. Pierce, Functional adaptive landscapes predict terrestrial capacity at the origin of limbs. *Nature* **589**, 242–245 (2021).

24. D. M. Raup, Computer as aid in describing form in gastropod shells. *Science* **138**, 150–152 (1962).
25. D. M. Raup, A. Michelson, Theoretical morphology of coiled shell. *Science* **147**, 1294–1295 (1965).
26. D. M. Raup, Geometry of coiling in gastropods. *Proc. Natl. Acad. Sci. U.S.A.* **47**, 602–609 (1961).
27. D. M. Raup, Geometric analysis of shell coiling in ammonoids. *J. Paleontol.* **41**, 43–65 (1967).
28. S. Van Wassenbergh, J. Brecko, P. Aerts, I. Stouten, G. Vanheusden, A. Camps, R. Van Damme, A. Herrel, Hydrodynamic constraints on prey-capture performance in forward-striking snakes. *J. R. Soc. Interface* **7**, 773–785 (2010).
29. S. W. Day, T. E. Higham, A. Y. Cheer, P. C. Wainwright, Spatial and temporal patterns of water flow generated by suction-feeding bluegill sunfish *Lepomis macrochirus* resolved by particle image velocimetry. *J. Exp. Biol.* **208**, 2661–2671 (2005).
30. P. C. Wainwright, M. D. McGee, S. J. Longo, L. P. Hernandez, Origins, innovations, and diversification of suction feeding in vertebrates. *Integr. Comp. Biol.* **55**, 134–145 (2015).
31. S. Van Wassenbergh, S. W. Day, L. P. Hernandez, T. E. Higham, T. Skorczewski, Suction power output and the inertial cost of rotating the neurocranium to generate suction in fish. *J. Theor. Biol.* **372**, 159–167 (2015).
32. S. Van Wassenbergh, P. Aerts, D. Adriaens, A. Herrel, A dynamic model of mouth closing movements in clariid catfishes: The role of enlarged jaw adductors. *J. Theor. Biol.* **234**, 49–65 (2005).
33. C. P. Kenaley, Exploring feeding behaviour in deep-sea dragonfishes (Teleostei: Stomiidae): Jaw biomechanics and functional significance of a loosejaw. *Biol. J. Linn. Soc.* **106**, 224–240 (2012).
34. J. F. V. Vincent, The trade-off: A central concept for biomimetics. *Bioinspir. Biomim. Nanobiomaterials* **6**, 67–76 (2017).
35. D. C. Adams, A generalized K statistic for estimating phylogenetic signal from shape and other high-dimensional multivariate data. *Syst. Biol.* **63**, 685–697 (2014).

36. C. N. Ciampaglio, M. Kemp, D. W. McShea, Detecting changes in morphospace occupation patterns in the fossil record: Characterization and analysis of measures of disparity. *Paleobiology* **27**, 695–715 (2001).
37. M. M. Munoz, Y. Hu, P. S. L. Anderson, S. N. Patek, Strong biomechanical relationships bias the tempo and mode of morphological evolution. *eLife* **7**, (2018).
38. C. Gans, R. G. Northcutt, Neural crest and the origin of vertebrates: A new head. *Science* **220**, 268–273 (1983).
39. R. G. Northcutt, Evolution of the optic tectum in ray-finned fishes, in *Fish Neurobiology 2. Higher Brain Areas and Functions*, R. E. Davis, R. G. Northcutt, Eds. (The University of Michigan Press, 1983), vol. 2, pp. 1–42.
40. C. Gans, Stages in the origin of vertebrates: Analysis by means of scenarios. *Biol. Rev.* **64**, 221–268 (1989).
41. L. A. Ferry, E. M. Paig-Tran, A. C. Gibb, Suction, ram, and biting: Deviations and limitations to the capture of aquatic prey. *Integr. Comp. Biol.* **55**, 97–109 (2015).
42. S. J. Coatham, J. Vinther, E. J. Rayfield, C. Klug, Was the Devonian placoderm *Titanichthysa* suspension feeder? *R. Soc. Open Sci.* **7**, 200272 (2020).
43. A. M. Herbert, P. J. Motta, Biomechanics of the jaw of the durophagous bonnethead shark. *Zoology (Jena)* **129**, 54–58 (2018).
44. J. Mallatt, Ventilation and the origin of jawed vertebrates: A new mouth. *Zool. J. Linnean Soc.* **117**, 329–404 (1996).
45. T. Miyashita, Fishing for jaws in early vertebrate evolution: A new hypothesis of mandibular confinement. *Biol. Rev.* **91**, 611–657 (2016).
46. P. S. L. Anderson, Cranial muscle homology across modern gnathostomes. *Biol. J. Linn. Soc.* **94**, 195–216 (2008).

47. M. Hughes, S. Gerber, M. A. Wills, Clades reach highest morphological disparity early in their evolution. *Proc. Natl. Acad. Sci. U.S.A.* **110**, 13875–13879 (2013).
48. L. J. Harmon, J. B. Losos, T. J. Davies, R. G. Gillespie, J. L. Gittleman, W. Bryan Jennings, K. H. Kozak, M. A. McPeck, F. Moreno-Roark, T. J. Near, A. Purvis, R. E. Ricklefs, D. Schluter, J. A. Schulte II, O. Seehausen, B. L. Sidlauskas, O. Torres-Carvajal, J. T. Weir, A. O. Mooers, Early bursts of body size and shape evolution are rare in comparative data. *Evolution* **64**, 2385–2396 (2010).
49. J. Marce-Nogue, T. A. Puschel, A. Daasch, T. M. Kaiser, Broad-scale morpho-functional traits of the mandible suggest no hard food adaptation in the hominin lineage. *Sci. Rep.* **10**, 6793 (2020).
50. N. M. Morales-Garcia, T. D. Burgess, J. J. Hill, P. G. Gill, E. J. Rayfield, The use of extruded finite-element models as a novel alternative to tomography-based models: A case study using early mammal jaws. *J. R. Soc. Interface* **16**, 20190674 (2019).
51. M. Ruta, J. Krieger, K. D. Angielczyk, M. A. Wills, The evolution of the tetrapod humerus: Morphometrics, disparity, and evolutionary rates. *Earth Environ. Sci. Trans. R. Soc. Edinb.* **109**, 351–369 (2018).
52. J. M. Carlo, M. S. Barbeitos, H. R. Lasker, Quantifying complex shapes: Elliptical fourier analysis of octocoral sclerites. *Biol. Bull.* **220**, 224–237 (2011).
53. F. Márquez, J. Robledo, G. E. Peñaloza, S. Van der Molen, Use of different geometric morphometrics tools for the discrimination of phenotypic stocks of the striped clam *Ameghinomya antiqua* (Veneridae) in north Patagonia, Argentina. *Fish. Res.* **101**, 127–131 (2010).
54. T. J. Challands, T. R. Smithson, J. A. Clack, C. E. Bennett, J. E. A. Marshall, S. M. Wallace-Johnson, H. Hill, A lungfish survivor of the end-Devonian extinction and an Early Carboniferous dipnoan radiation. *J. Syst. Palaeontol.* **17**, 1825–1846 (2019).
55. L. Frey, M. Coates, M. Ginter, V. Hairapetian, M. Rucklin, I. Jerjen, C. Klug, The early elasmobranch *Phoebodus*: Phylogenetic relationships, ecomorphology and a new time-scale for shark evolution. *Proc. Biol. Sci.* **286**, 20191336 (2019).



56. A. M. Clement, B. King, S. Giles, B. Choo, P. E. Ahlberg, G. C. Young, J. A. Long, Neurocranial anatomy of an enigmatic Early Devonian fish sheds light on early osteichthyan evolution. *eLife* **7**, e34349 (2018).
57. J. A. Clack, T. J. Challands, T. R. Smithson, K. Z. Smithson, . Newly recognized Famennian lungfishes from East Greenland reveal tooth plate diversity and blur the Devonian–Carboniferous boundary. *Pap. Palaeontol.* **5**, 261–279 (2019).
58. B. Choo, J. Lu, S. Giles, K. Trinajstić, J. A. Long, A. Smith, A new actinopterygian from the Late Devonian Gogo Formation, Western Australia. . *Pap. Palaeontol.* **5**, 343–363 (2019).
59. J. D. Pardo, M. Szostakiwskyj, P. E. Ahlberg, J. S. Anderson, Hidden morphological diversity among early tetrapods. *Nature* **546**, 642–645 (2017).
60. N. Takezaki, H. Nishihara, Support for lungfish as the closest relative of tetrapods by using slowly evolving ray-finned fish as the outgroup. *Genome Biol. Evol.* **9**, 93–101 (2017).
61. A. Kemp, L. Cavin, G. Guinot, Evolutionary history of lungfishes with a new phylogeny of post-Devonian genera. *Palaeogeogr. Palaeoclimatol. Palaeoecol.* **471**, 209–219 (2017).
62. B. King, T. Qiao, M. S. Y. Lee, M. Zhu, J. A. Long, Bayesian morphological clock methods resurrect placoderm monophyly and reveal rapid early evolution in jawed vertebrates. *Syst. Biol.* **66**, 499–516 (2017).
63. M. I. Coates, J. A. Finarelli, I. J. Sansom, P. S. Andreev, K. E. Criswell, K. Tietjen, M. L. Rivers, P. J. La Riviere, An early chondrichthyan and the evolutionary assembly of a shark body plan. *Proc. Biol. Sci.* **285**, 20172418 (2018).
64. M. Zhu, P. E. Ahlberg, Z. Pan, Y. Zhu, T. Qiao, W. Zhao, L. Jia, J. Lu, A Silurian maxillate placoderm illuminates jaw evolution. *Science* **354**, 334–336 (2016).
65. S. Giles, M. Friedman, M. D. Brazeau, Osteichthyan-like cranial conditions in an Early Devonian stem gnathostome. *Nature* **520**, 82–85 (2015).

66. M. D. Brazeau, M. Friedman, The origin and early phylogenetic history of jawed vertebrates. *Nature* **520**, 490–497 (2015).
67. V. Dupret, S. Sanchez, D. Goujet, P. Tafforeau, P. E. Ahlberg, A primitive placoderm sheds light on the origin of the jawed vertebrate face. *Nature* **507**, 500–503 (2014).
68. B. Choo, Revision of the actinopterygian genus *Mimipiscis* (= *Mimia*) from the Upper Devonian Gogo Formation of Western Australia and the interrelationships of the early Actinopterygii. *Earth Environ. Sci. Trans. R. Soc. Edinb.* **102**, 77–104 (2012).
69. K. Trinajstić, K. Dennis-Bryan, Phenotypic plasticity, polymorphism and phylogeny within placoderms. *Acta Zool.* **90**, 83–102 (2009).
70. M. Zhu, W. Zhao, L. Jia, J. Lu, T. Qiao, Q. Qu, The oldest articulated osteichthyan reveals mosaic gnathostome characters. *Nature* **458**, 469–474 (2009).
71. M. D. Brazeau, The braincase and jaws of a Devonian “acanthodian” and modern gnathostome origins. *Nature* **457**, 305–308 (2009).
72. J. A. Long, B. Choo, G. C. Young, A new basal actinopterygian fish from the Middle Devonian Aztec Siltstone of Antarctica. *Antarct. Sci.* **20**, 393–412 (2008).
73. D. W. Bapst, paleotree: An R package for paleontological and phylogenetic analyses of evolution. *Methods Ecol. Evol.* **3**, 803–807 (2012).
74. D. C. Adams, E. Otárola-Castillo, E. Paradis, geomorph: An R package for the collection and analysis of geometric morphometric shape data. *Methods Ecol. Evol.* **4**, 393–399 (2013).
75. P. D. Polly, Functional tradeoffs carry phenotypes across the valley of the shadow of death. *Integr. Comp. Biol.* **60**, 1268–1282 (2020).
76. Z. J. Tseng, J. L. McNitt-Gray, H. Flashner, X. Wang, R. Enciso, Model sensitivity and use of the comparative finite element method in mammalian jaw mechanics: Mandible performance in the gray wolf. *PLOS ONE* **6**, e19171 (2011).

77. D. Adriaens, A. Lakhtakia, R. J. Martín-Palma, M. Knez, paper presented at the Bioinspiration, Biomimetics, and Bioreplication IX, 2019.
78. O. Shoval, H. Sheftel, G. Shinar, Y. Hart, O. Ramote, A. Mayo, E. Dekel, K. Kavanagh, U. Alon, Evolutionary trade-offs, pareto optimality, and the geometry of phenotype space. *Science* **336**, 1157–1160 (2012).
79. A. Tandler, A. Mayo, U. Alon, Evolutionary tradeoffs, Pareto optimality and the morphology of ammonite shells. *BMC Syst. Biol.* **9**, 12 (2015).
80. D. E. Goldberg, *Genetic Algorithms in Search, Optimization and Machine Learning* (Addison-Wesley Longman Publishing Co. Inc., 1989).
81. C. M. Fonseca, P. J. Fleming, Multiobjective optimization and multiple constraint handling with evolutionary algorithms—part I: A unified formulation. *IEEE Trans. Syst. Man Cybern. 1 Syst. Humans* **28**, 26–37 (1998).
82. I. Alberto, C. Azcarate, F. Mallor, P. M. Mateo, Multiobjective evolutionary algorithms. Pareto rankings. *Monografías del Semin. Matem. García de Galdeano* **27**, 27–35 (2003).
83. P. E. Ahlberg, J. A. Clack, Lower jaws, lower tetrapods—A review based on the Devonian genus *Acanthostega*. *Trans. R. Soc. Edinb. Earth Sci.* **89**, 11–46 (1998).
84. M. Zhu, X. Yu, Lower jaw character transitions among major sarcopterygian groups—A survey based on new materials from Yunnan, China, in *Recent Advances in the Origin and Early Radiation of Vertebrates*, G. Arratia, M. V. H. Wilson, R. Cloutier, Eds. (Pfeil, 2004), pp. 271–286.
85. K. S. W. Campbell, R. E. Barwick, A new tooth-plated dipnoan from the Upper Devonian Gogo Formation and its relationships. *Mem. Queensl. Mus.* **42**, 403–437 (1998).
86. A. Heintz, Fischreste aus dem Unterperm Norwegens. *Norsk Geol. Tidsskr.* **14**, 176–194 (1934).
87. J. Lu, M. Zhu, An Early Devonian (Pragian) sarcopterygian from Zhaotong, Yunnan, China. *Vertebrata Palasiatica* **46**, 161 (2008).

88. H. Jessen, Weitere Fischreste aus dem Oberen Plattenkalk der Bergisch-Gladbach-Paffrather Mulde (Oberdevon, Rheinisches Schiefergebirge). *Palaeontographica Abt. A* **143**, 159–187 (1973).
89. J. A. Long, Cranial anatomy of two new late Devonian lungfishes (Pisces: Dipnoi) from Mount Howitt, Victoria. *Rec. Aust. Mus.* **44**, 299–318 (1992).
90. M. Rücklin, P. C. Donoghue, Z. Johanson, K. Trinajstić, F. Marone, M. Stampanoni, Development of teeth and jaws in the earliest jawed vertebrates. *Nature* **491**, 748–751 (2012).
91. R. K. Carr, Placoderm diversity and evolution. *Bull. Mus. Natl. Hist. Nat. Paris* **17**, 85–125 (1995).
92. D. H. Dunkle, A new genus and species of arthrodiran fish from the Upper Devonian Cleveland Shale. *Sci. Publ. Cleve. Mus. Nat. Hist.* **8**, 103–117 (1947).
93. K. S. W. Campbell, R. E. Barwick, T. J. Senden, Evolution of dipnoans (lungfish) in the Early Devonian of southeastern Australia. *Alcheringa* **33**, 59–78 (2009).
94. J. E. Harris, The neurocranium and jaws of *Cladoselache*. *Sci. Publ. Cleve. Mus. Nat. Hist.* **8**, 7–12 (1938).
95. A. Heintz, Revision of the structure of *Coccoosteus decipiens* Ag. *Norsk Geol. Tidsskr.* **12**, 291–313 (1931).
96. L. Hussakof, W. L. Bryant, Catalogue of the fossil fishes in the museum of the Buffalo Society of Natural Sciences. *Buffalo Soc. Nat. Hist. Sci. Bull.* **12**, 1–346 (1919).
97. H. G. Johnson, D. K. Elliott, A new ptyctodont (Placodermi) from the Upper Devonian Martin Formation of northern Arizona, and an analysis of ptyctodont phylogeny. *J. Paleontol.* **70**, 994–1003 (1996).
98. E. B. Daeschler, Early tetrapod jaws from the Late Devonian of Pennsylvania, USA. *J. Paleontol.* **74**, 301–308 (2000).

99. M. M. Smith, M.-M. Chang, The dentition of *Diabolepis speratus* Chang and Yu, with further consideration of its relationships and the primitive dipnoan dentition. *J. Vertebr. Paleontol.* **10**, 420–433 (1990).
100. M. Friedman, *Styloichthys* as the oldest coelacanth: Implications for early osteichthyan interrelationships. *J. Syst. Palaeontol.* **5**, 289–343 (2007).
101. B. Young, R. L. Dunstone, T. J. Senden, G. C. Young, A gigantic sarcopterygian (tetrapodomorph lobe-finned fish) from the upper Devonian of Gondwana (Eden, New South Wales, Australia). *PLOS ONE* **8**, e53871 (2013).
102. J. A. Clack, *Gaining Ground: The origin and Evolution of Tetrapods* (Indiana Univ. Press, 2012).
103. J. A. Long, A new genus of fossil coelacanth (Osteichthyes: Coelacanthiformes) from the Middle Devonian of southeastern Australia. *Rec. West. Aust. Mus.* **57**, 37–53 (1999).
104. J. A. Long, R. E. Barwick, K. S. W. Campbell, Osteology and functional morphology of the osteolepiform fish *Gogonasus andrewsae* Long, 1985, from the Upper Devonian Gogo Formation, Western Australia. *Rec. West. Aust. Mus.* **53**, 1-89 (1997).
105. B. Choo, J. A. Long, K. Trinajstić, A new genus and species of basal actinopterygian fish from the Upper Devonian Gogo Formation of Western Australia. *Acta Zool.* **90**, 194-210 (2009).
106. P. S. L. Anderson, Shape variation between arthrodire morphotypes indicates possible feeding niches. *J. Vertebr. Paleontol.* **28**, 961-969 (2008).
107. Z. Gorizdro-Kulczycka, Dwudyszne ryby dewońskie Gór Świętokrzyskich. *Acta Geol. Pol.* **1**, 53-105 (1950).
108. J. P. Downs, *Holoptychius bergmanni* sp. nov. (Sarcopterygii, Porolepiformes) from the Upper Devonian of Nunavut, Canada, and a review of *Holoptychius* taxonomy. *Proc. Acad. Natl. Sci. Phila.* **162**, 47-59 (2013).

109. E. Mark-Kurik, The inferognathal in the Middle Devonian arthrodire *Homostius*. *Lethaia* **25**, 173-178 (1992).
110. J. A. Long, A new Late Devonian acanthodian fish from Mt. Howitt, Victoria, Australia, with remarks on acanthodian biogeography. *Proc. R. Soc. Victoria* **98**, 1-17 (1986).
111. J. A. Long, New palaeoniscoid fishes from the Late Devonian and Early Carboniferous of Victoria. *Mem. Assoc. Australas. Palaeontol.* **7**, 1-64 (1988).
112. E. B. Daeschler, J. P. Downs, New description and diagnosis of *Hynieria lindae* (Sarcopterygii, Tristichopteridae) from the Upper Devonian Catskill Formation in Pennsylvania, USA. *J. Vertebr. Paleontol.* **38**, e1448834 (2018).
113. E. I. White, The old red sandstone of brown cleve Hill and the adjacent area II. Palaeontology, in *Bulletin of the British Museum (Natural History), Geology* [London: BM(NH), 1961], vol. 5, pp. 243–310.
114. E. I. Vorobyeva, Morphology and nature of evolution of crossopterygian fish. *Trudy Paleontologicheskogo Instituta* **163**, 1-239 (1977).
115. K. Trinajstic, J. A. Long, A new genus and species of Ptyctodont (Placodermi) from the Late Devonian Gneudna Formation, Western Australia, and an analysis of Ptyctodont phylogeny. *Geol. Mag.* **146**, 743-760 (2009).
116. E. I. Vorobyeva, A new species of *Laccognathus* (Porolepiform Crossopterygii) from the Devonian of Latvia. *Paleontol. Zhurnal* **40**, 312-322 (2006).
117. J. Kulczycki, Upper devonian fishes from the holy cross mountains. *Acta Palaeontol. Pol.* **2**, 285-380 (1957).
118. J. A. Long, K. Trinajstic, G. C. Young, T. Senden, Live birth in the Devonian period. *Nature* **453**, 650-652 (2008).

119. M. Zhu, W. Wang, X. Yu, *Meemania eos*, a basal sarcopterygian fish from the Lower Devonian of China—Expanded description and significance, in *Morphology, Phylogeny and palaeobiogeography of Fossil Fishes*, D. K. Elliott, J. G. Maisey, X. Yu, D. Miao, Eds. (Verlag Dr Friedrich Pfeil, 2010), pp. 199–214.
120. B. Choo, M. Zhu, W. Zhao, L. Jia, Y. Zhu, The largest Silurian vertebrate and its palaeoecological implications. *Sci. Rep.* **4**, 5242 (2015).
121. P. L. Forey, P. E. Ahlberg, E. Lukševičs, I. Zupinš, A new coelacanth from the Middle Devonian of Latvia. *J. Vertebr. Paleontol.* **20**, 243-252 (2000).
122. N. I. Krupina, R. R. Reisz, D. Scott, The skull and tooth system of *Orlovichthys limnatis*, a Late Devonian dipnoan from Russia. *Can. J. Earth Sci.* **38**, 1301-1311 (2001).
123. A. M. Clement, “The anatomy, evolution and interrelationships of Devonian Dipnoans, with insights from the extant Australian lungfish, *Neoceratodus forsteri*,” thesis, Australian National University (2011).
124. T. Ørvig, Histologic studies of ostracoderms, placoderms and fossil elasmobranchs 3. Structure and growth of gnathalia of certain arthrodires. *Zool. Scr.* **9**, 141-159 (1980).
125. E. Jarvik, Middle and Upper Devonian porolepiformes from East Greenland with special reference to *Glyptolepis groenlandica* n.sp. and a discussion on the structure of the head in the porolepiformes. *Medd. Grønland* **187**, 1-307 (1972).
126. H. L. Jessen, Lower Devonian Porolepiformes from the Canadian Arctic with special reference to *Powichthys thorsteinssoni* Jessen. *Palaeontographica Abt. A* **167**, 180-214 (1980).
127. G. F. Hanke, *Promesacanthus eppleri* n. gen., n. sp., a mesacanthid (Acanthodii, Acanthodiformes) from the Lower Devonian of northern Canada. *Geodiversitas* **30**, 287-302 (2008).
128. R. S. Miles, The acanthodian fishes of the Devonian Plattenkalk of the Paffrath Trough in the Rhineland, with an appendix containing a classification of the Acanthodii and a revision of the genus *Homalacanthus*. *Arkiv Zool.* **18**, 147-194 (1966).

129. R. W. Gess, M. I. Coates, Fossil juvenile coelacanths from the Devonian of South Africa shed light on the order of character acquisition in actinistians. *Zool. J. Linnean Soc.* **175**, 360-383 (2015).
130. D. Snitting, A redescription of the anatomy of the Late Devonian *Spodichthys buetleri* Jarvik, 1985 (Sarcopterygii, Tetrapodomorpha) from East Greenland. *J. Vertebr. Paleontol.* **28**, 637-655 (2008).
131. E. B. Daeschler, N. H. Shubin, F. A. Jenkins, A Devonian tetrapod-like fish and the evolution of the tetrapod body plan. *Nature* **440**, 757-763 (2006).
132. J. Boyle, M. J. Ryan, New information on *Titanichthys* (Placodermi, Arthrodira) from the Cleveland Shale (Upper Devonian) of Ohio, USA. *J. Paleontol.* **91**, 318-336 (2017).
133. J. Lu, M. Zhu, J. A. Long, W. Zhao, T. J. Senden, L. Jia, T. Qiao, The earliest known stem-tetrapod from the Lower Devonian of China. *Nat. Commun.* **3**, 1160 (2012).
134. R. S. Miles, T. S. Westoll, IX.—Two new genera of coccosteid arthrodira from the Middle Old Red Sandstone of Scotland, and their Stratigraphical distribution. *Trans. R. Soc. Edinburgh* **65**, 179-210 (1962).
135. T. Ørvig, Some new acanthodian material from the Lower Devonian of Europe. *Zool. J. Linnean Soc.* **47**, 131-153 (1967).
136. J. A. Clack, P. E. Ahlberg, H. Blom, S. M. Finney, A new genus of Devonian tetrapod from North-East Greenland, with new information on the lower jaw of *Ichthyostega*. *Palaeontology* **55**, 73-86 (2012).
